# Supplementary material
Source: PubMed Central journal article supplement (PMC3416271)

1 **SUPPLEMENTAL FIGURE LEGENDS**

2 FIG. S1. Pieces of gels in which total proteins extracted from (A) the parental strain  
3 (BW25113) and (B) the *rpoS* deleted strain of the stationary growth phase (cultured for 2  
4 days) are separated by RFHR 2D-PAGE. YqjD is not expressed in the mutant cell. This  
5 means that the expression of YqjD is regulated by RpoS.

6

7 FIG. S2. An alignment of amino acid sequences of YqjD, ElaB, and YgaM from the *E. coli*  
8 W3110 strain. ElaB and YgaM were picked up as paralogous proteins by the BLAST  
9 search. Asterisks in the C-terminal region indicate the position of the transmembrane motif  
10 of YqjD predicted by a program of secondary structure prediction.

11

12 FIG. S3. Gene expressions of *yqjD*, *elaB*, and *ygaM* analyzed using a real-time PCR method.  
13 Horizontal and vertical axes indicate the time cells were harvested after incubation and the  
14 relative intensity of expression, respectively. The expression intensity was normalized to  
15 the peak value. That of *rpsB*, coding ribosomal protein S2, was measured as a control.

16

17 FIG. S4. Gels of RFHR 2D-PAGE in which proteins contained in RF were extracted from  
18 overexpressing cells of 6xHis-tagged ElaB (A) and YgaM (B) by adding 0.3 mM IPTG.  
19 These results suggest that ElaB and YgaM bind to ribosomes.

## Figure S1

A Parental cell

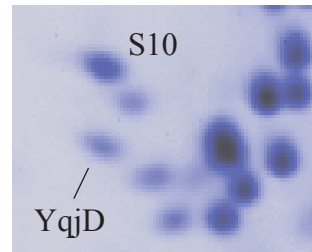

B Mutant cell ( $\Delta rpoS$ )

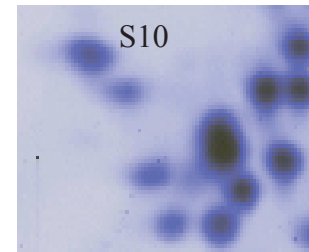

Figure S2

YqjD: ----- -MSKEHTTEH LRAELKSLSD TLEEVLSSSG EKSKEELSKI RSKAEQALKQ  
ElaB: ----- -MSNQFGDTR IDDDLTLLESE TLEEVLRSSG DPADQKYVEL KARA EKALDD  
YgaM: MGDHMFNRPN RNDVDDGVQD IQNDVNQLAD SLESVLKSWG SDAKGEAEAA RSKAQALLKE

\*\*\* \*\*\*\*\* \*\*\*\*\*  
YqjD: SRYRLGETGD AIAKQTRVAA ARADEYVREN PWTGVGIGAA IGVVLGVLLS RR  
ElaB: VKKRVSQASD SYYYRAKQAV YRADDYVHEK PWQGIGVGAA VGLVLGLLLA RR  
YgaM: TRARM-HGRT RVQQAARDAV GCADSFVRER PWCSVGTAAA VGIFIGALLS MRKS

Figure S3

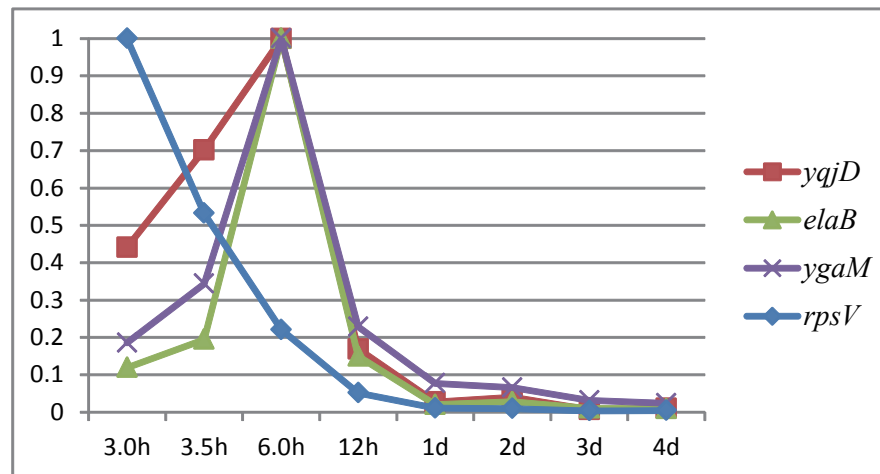

Figure S4

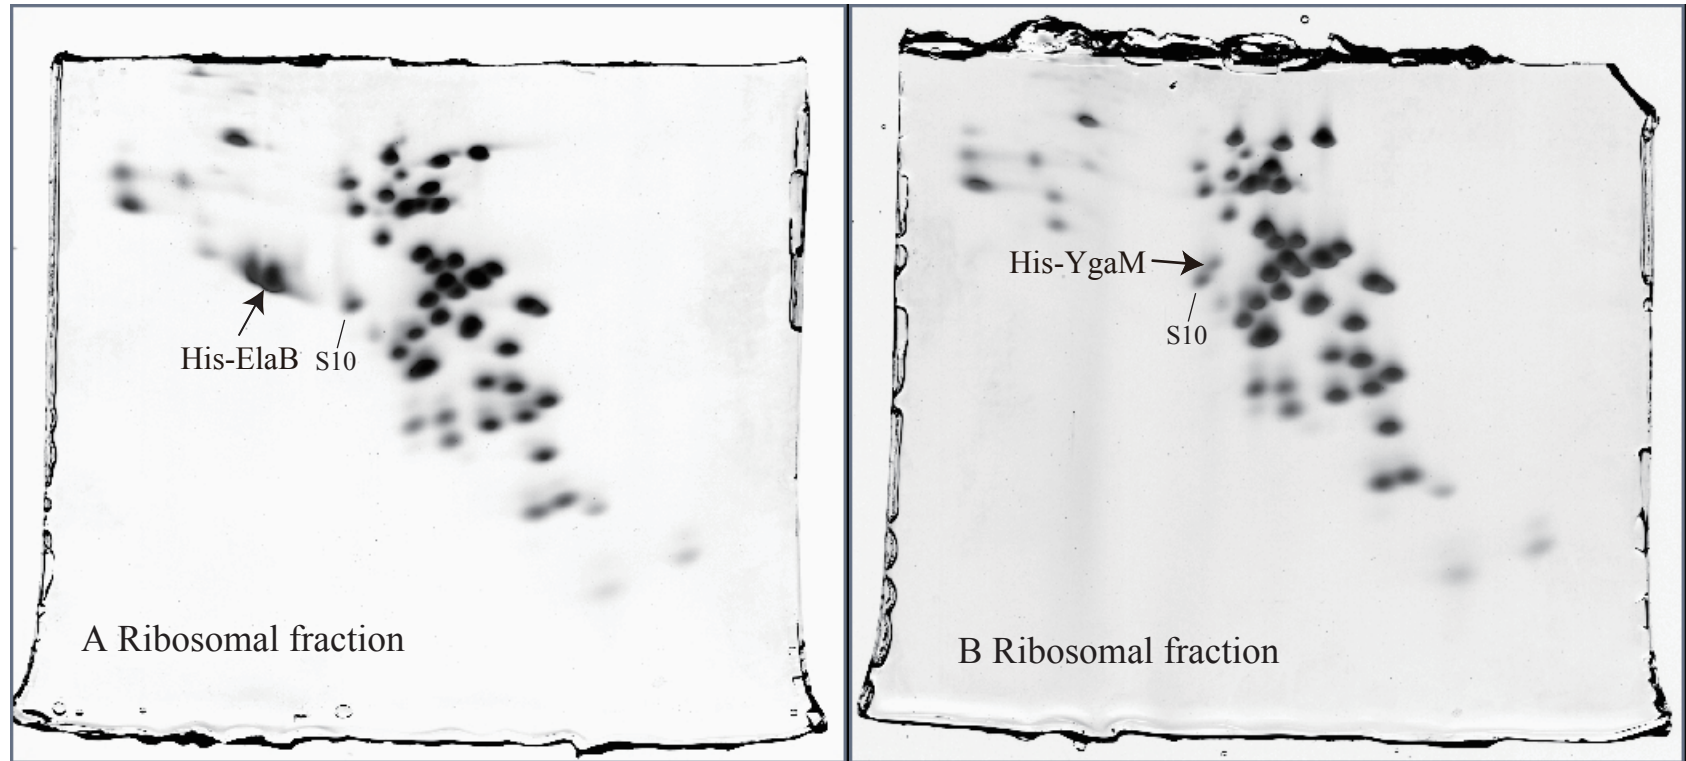

Supplement: JB.00396-12_zjb999091734so1.pdf [file JB.00396-12_zjb999091734so1.pdf]
